# Supplementary material for: Depleting Mycobacterium tuberculosis of the transcription termination factor Rho causes pervasive transcription and rapid death
Source: Nat Commun. 2017 Mar 28;8:14731. doi: 10.1038/ncomms14731 (PMC5379054; doi:10.1038/ncomms14731)
Supplement: Supplementary Information — Supplementary Figures, Supplementary Tables and Supplementary References [file ncomms14731-s1.pdf]

**a**

H37Rv WT strain *rho* locus

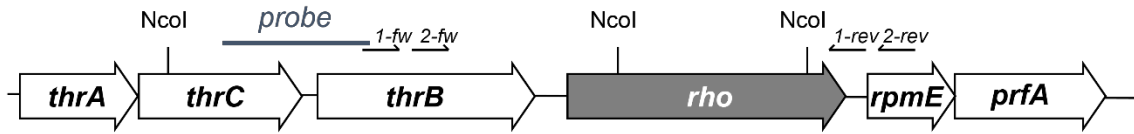

H37Rv  $\Delta\rho$  strain *rho* locus

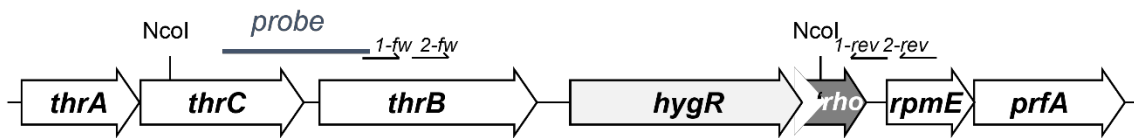

**b**

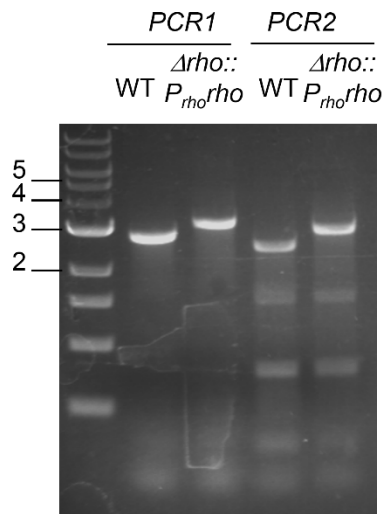

**c**

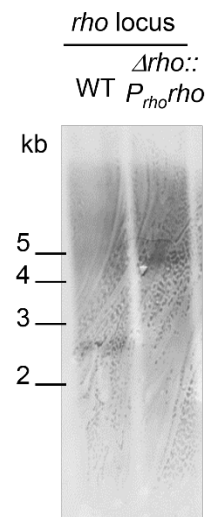

**d**

Rho-DUC mutant strain

*rho* locus

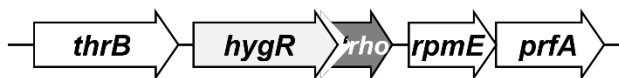

*attL5* site

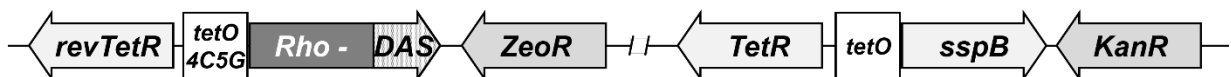

*tweety* site

## 2    **Supplementary Figure 1 | Construction of *M. tuberculosis* Rho-DUC**

3    **(a)** Representation of the *rho* locus in the genome *M. tuberculosis* H37Rv wild-type (WT) and *M.*  
4    *tuberculosis*  $\Delta\rho::PrhoTb$ , in which the WT copy of *rho* has been replaced with a hygromycin resistance  
5    (*hygR*) cassette. The primers used for the discriminative PCRs shown in (b) are indicated as arrows  
6    above the genes. The site recognized by the restriction enzyme NcoI as well as the region probe used in  
7    the southern blot verification of the strain genotype (c) are indicated as well.

8    **(b)** Discriminative amplification of the *rho* locus of the WT strain and  $\Delta\rho::PrhoTb$  using the primers 1-  
9    fw and 1-rev or 2-fw and 2-rev for respectively the PCR 1 or 2. The expected sizes of the products are  
10    2795 bp for the WT and 3317 bp for the mutant in the PCR 1 and 2548 bp for the WT and 3070 bp for  
11    the mutant in the PCR 2. In addition, the insertion at the correct locus has also been verified by  
12    sequencing.

13    **(c)** *rho* locus specific probing by southern blot of the NcoI digested DNA, of WT and  $\Delta\rho::PrhoTb$ .  
14    Expected sizes of the fragments recognized by the probe are 2377 bp and 4576 bp for the WT and the  
15    mutant respectively.

16    **(d)** Genotype of the Dual-Control *rho* strain (Rho-DUC).

17

18

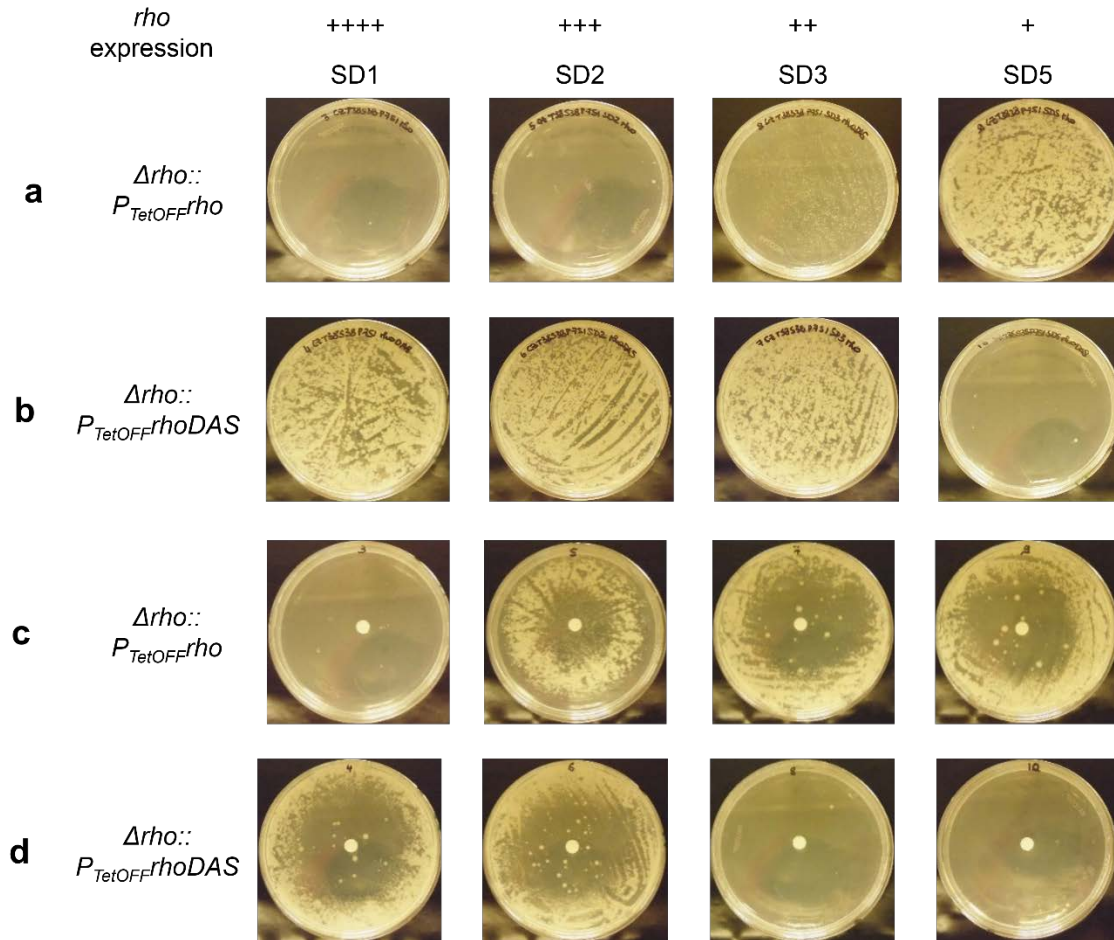

19

## 20 **Supplementary Figure 2 | DAS-tagging reduces the activity of Rho in *M. tuberculosis* .**

21 The effect of the DAS+4-tag on Rho activity was evaluated by complementing the genetic inactivation of  
 22 *rho* with different expression cassettes. Expression of Rho was varied by using translation initiation  
 23 signals of different strengths (SD1>SD2>SD3>SD5) as described<sup>1</sup>. The constitutively expressed wt copy  
 24 of *rho* of the *rho att* site mutant  $\Delta\rho::P_{rho}\rho$  was replaced by constructs that allowed high-to-low  
 25 expression of *rho* or *rho-DAS* (from high to low expression: PtetOFF-SD#1, PtetOFF-SD#2, PtetOFF-  
 26 SD#3, PtetOFF-SD#5). Panels (a) and (b) show plates without atc; panels (c) and (d) show plates to  
 27 which 100 ng of atc was added using a paper disc.

28 Strong expression of WT Rho was toxic as exemplified by the absence of growth on solid media without  
 29 atc (panels a & c). The use of weaker translational initiation signals restored growth, suggesting that a  
 30 moderate expression of WT Rho was sufficient to support growth. However, when using Rho-DAS+4,  
 31 growth only occurred when Rho-DAS was expressed using strong translational initiation signals (SD1 to  
 32 SD3) (panels b). This suggested that addition of the DAS+4-tag reduced the *in vivo* activity of Rho and  
 33 caused a need for stronger expression to achieve growth.

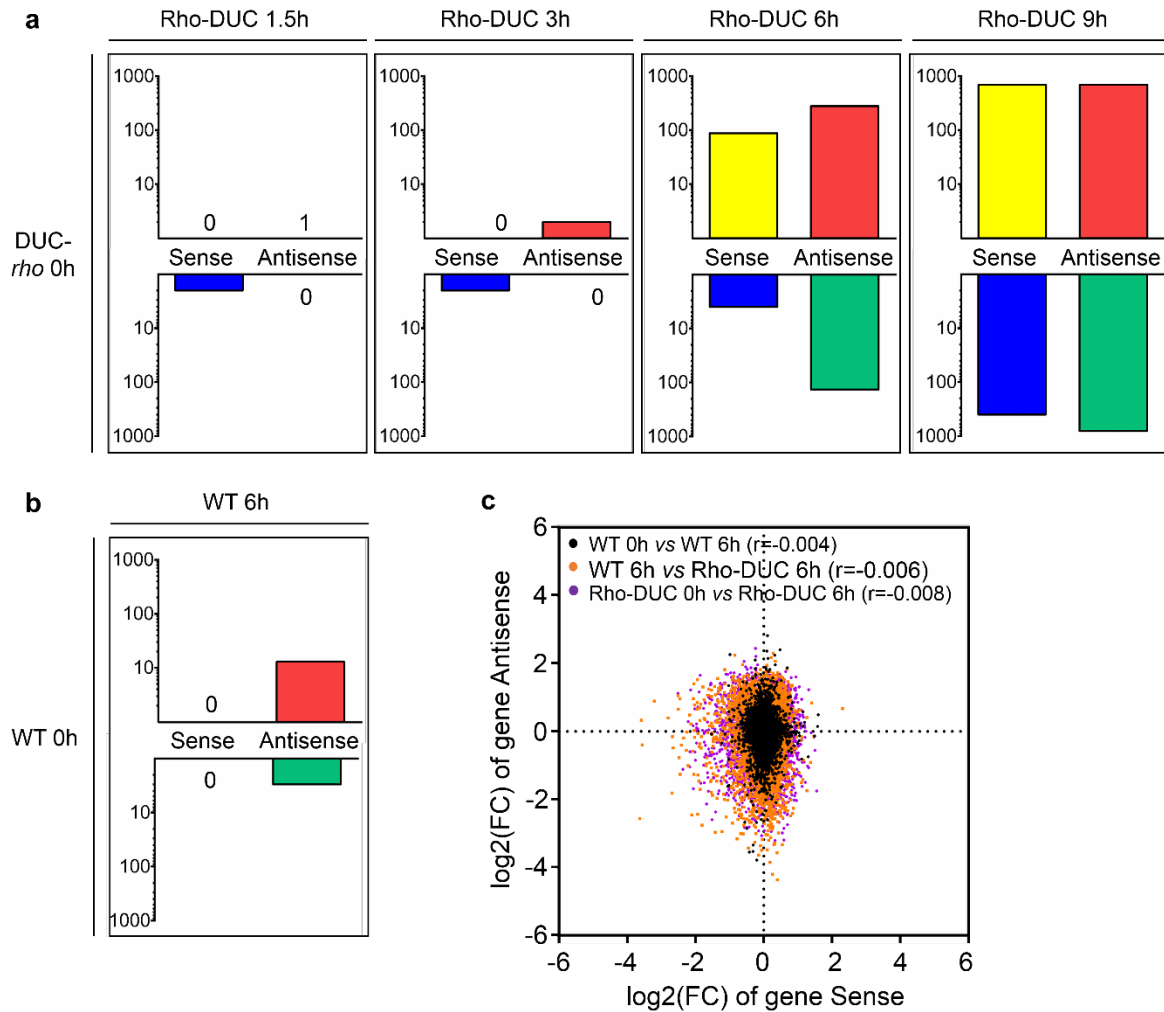

34

### 35 **Supplementary Figure 3 | Number of transcripts that changed in abundance after atc exposure**

36 Transcripts were scored as changed if their abundance increased or decreased more than 2.5-fold with  
 37 a False Discovery Rate [FDR] of less than 0.05. Changes are reported separately for sense and the  
 38 antisense transcripts. The top histograms indicate upregulated transcripts; bottom histograms indicate  
 39 downregulated transcripts.

40 **(a)** Gene expression changes in the Rho-DUC mutant upon *rho* silencing.

41 **(b)** Gene expression changes in WT after cultivation with atc.

42 **(c)** Correlation of the abundance changes of the antisense and sense transcripts of each gene when  
 43 comparing WT 0h / WT 6h ( $r = -0.004$ ), WT 6h / Rho-DUC 6h ( $r = -0.006$ ) and Rho-DUC 0h / Rho-DUC 6h  
 44 ( $r = -0.008$ ).

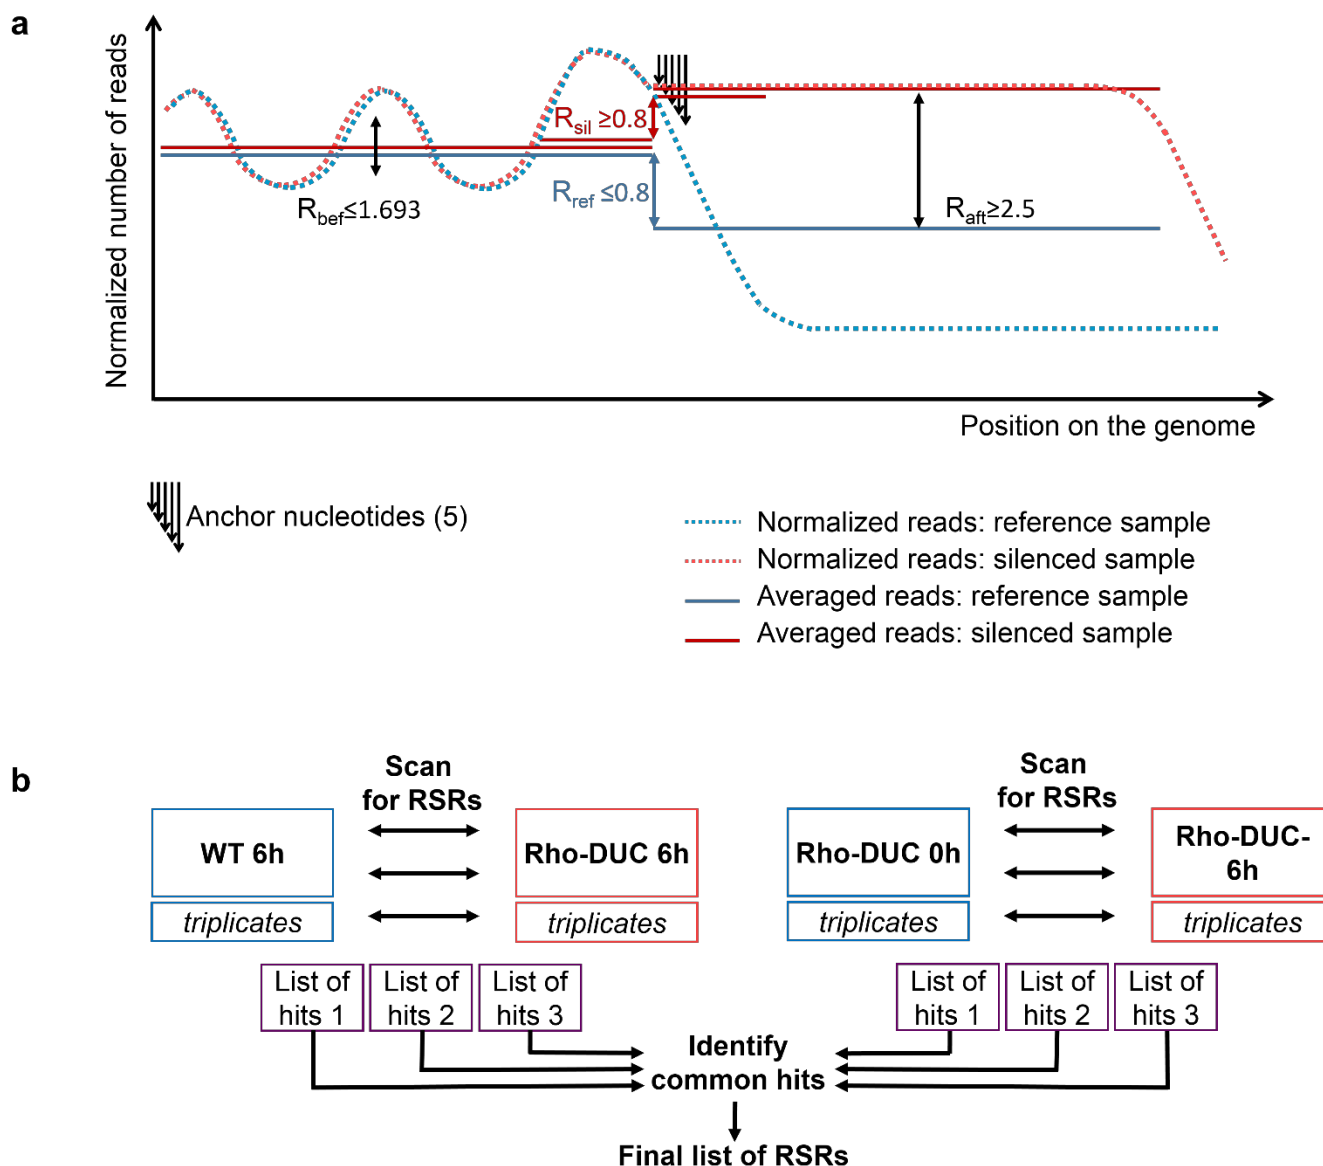

45

#### 46 Supplementary Figure 4 | Identification of RSRs

47 (a) Schematic representation of the calculations and filters applied to define candidate RSRs. The red  
 48 dashed lines represent the normalized reads of the sample in which *rho* expression was silenced;  
 49 normalized reads of the reference sample are shown in blue. The small arrows represent consecutive  
 50 anchor nucleotides for which the ratio between silenced and reference conditions does not decrease. To  
 51 avoid the noise associated with low read numbers we excluded anchor nucleotides whose average read  
 52 numbers were in the lowest quartile of the silenced sample. The 3'-end of an initial RSR hit was defined  
 53 as the first nucleotide at which the ratio between silenced sample and reference sample falls back to the  
 54 value of the anchor nucleotides. We then defined four ratios,  $R_{bef}$ ,  $R_{aft}$ ,  $R_{ref}$ , and  $R_{sil}$  as follows: (1) To

55 calculate  $R_{\text{bef}}$  we first defined the relevant local upstream element as the region that is equal to the length  
56 of the initial RSR hit and located right upstream of the anchor nucleotides. We then divided the average  
57 upstream reads of the silenced sample by the average upstream reads in the reference sample. (2)  $R_{\text{aft}}$   
58 was calculated by dividing the average reads of the silenced sample after the anchor nucleotides by the  
59 corresponding average reads in the reference sample. (3)  $R_{\text{ref}}$  was defined as the ratio of average reads  
60 of the reference sample before and after the anchor nucleotides. (4)  $R_{\text{sil}}$  was calculated by dividing the  
61 average reads in the silenced sample over 250 positions after the anchor nucleotides by the average  
62 reads in the silenced sample over 250 positions before the anchor nucleotides. Candidate RSRs were  
63 then defined as regions with (i)  $R_{\text{bef}} \leq 1.7$ ,  $R_{\text{aft}} \geq 2.5$ ,  $R_{\text{ref}} \leq 0.8$ , and  $R_{\text{sil}} \geq 0.8$  and for which (ii) the average  
64 reads of the reference sample after the anchor nucleotides were equal or higher than the arbitrary value  
65 of 0.0017 over the entire length of the initial RSR hit.

66 **(b)** Workflow for final RSR identification. Candidate RSRs identified in at least 4 of the 6 comparisons  
67 were scored as final RSRs.

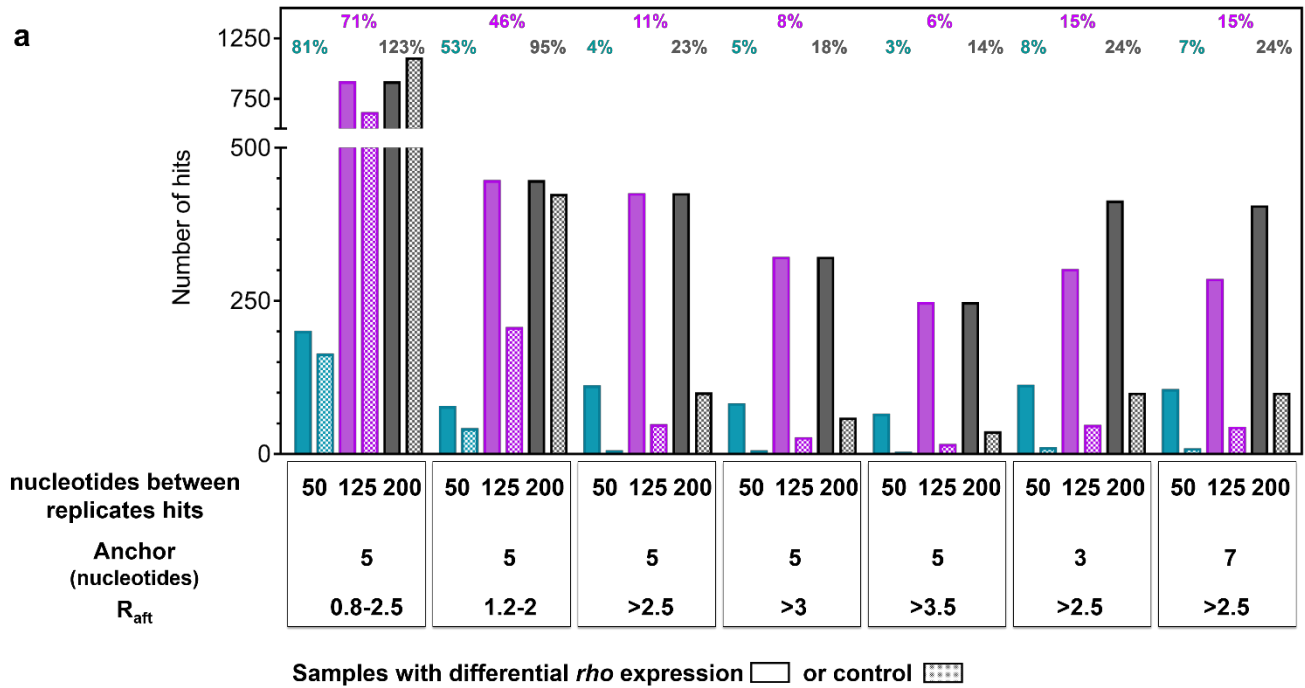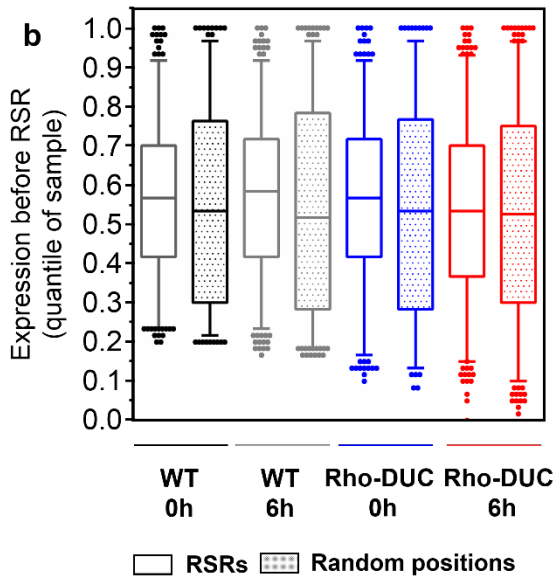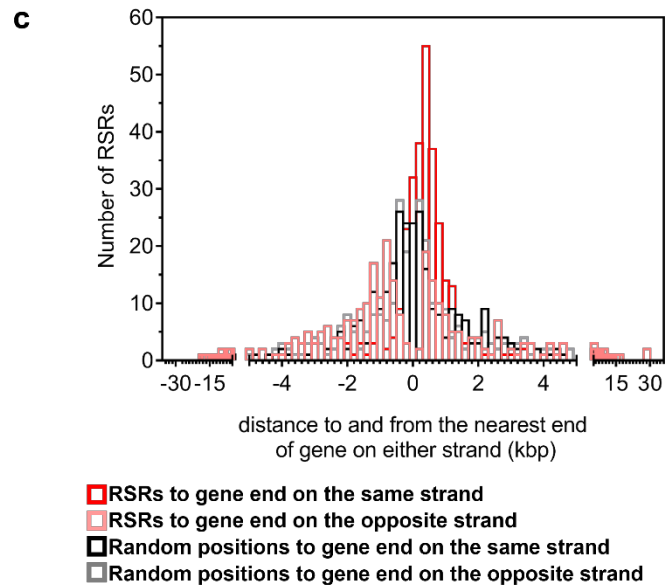

68

## 69 Supplementary Figure 5 | RSR identification criteria and RSR characteristics

70 (a) This figure shows how many putative RSRs are identified using different selection criteria. The  
 71 parameters tested were (i) different numbers of anchor nucleotides, (ii) different values for  $R_{raft}$ , and (iii)  
 72 the maximal distance allowed between hits found in different replicates to consider them as being the  
 73 same RSR during cross-checking (50, 125, or 200 nucleotides). The solid bars show the number of hits

74 obtained from the comparisons of Rho-DUC 6h with Rho-DUC 0h and WT 6h. The lighter pattern bars  
75 indicate the average number of hits obtained when either one of these comparisons was crossed with  
76 hits obtained by comparing WT 0h with Rho-DUC 0h. For each parameter change, specificity is measured  
77 with the average number of hits found in the controls expressed as a percentage of the number of hits  
78 indicated by the plain bars.

79 **(b)** RSRs are not biased towards regions with high or low transcript abundance. Transcript levels of the  
80 250 bp preceding each RSR were calculated in 4 samples: WT before atc treatment (0h), WT after 6h of  
81 atc treatment, Rho-DUC before atc treatment (0h) and Rho-DUC after 6h of atc treatment. Since all  
82 samples do not have all the same overall level of RNAseq reads, the values are here expressed as  
83 quantiles part of the corresponding sample. Side by side is the same analysis of a randomly generated  
84 list of positions (boxplot shows the median value, 25 and 75 quantiles and outliers at the bottom and top  
85 5%).

86 **(c)** RSRs are preferentially located around the 3'-end of the gene located upstream and on the same  
87 strand as an individual RSR. Distribution of the RSRs starts around the nearest end of a gene on the  
88 sense or antisense strand. Comparison of the distribution of the RSRs start positions and of a randomly  
89 generated list of positions around the nearest end of a gene on the sense or on the antisense strand.

90

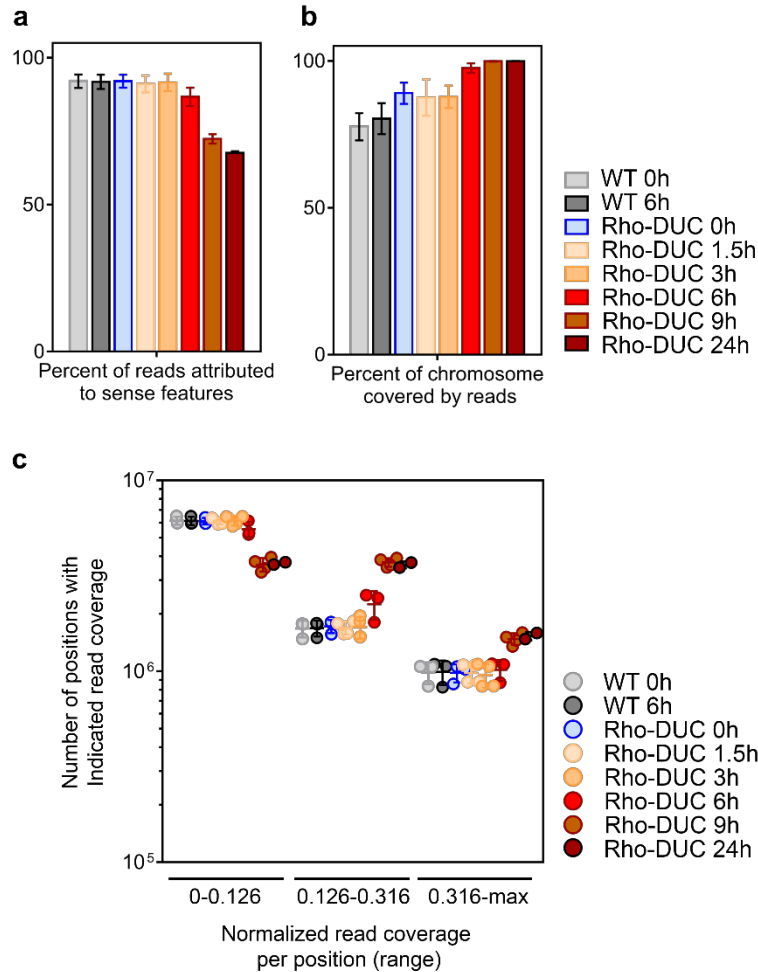

### Supplementary Figure 6 | Prolonged depletion of Rho increases antisense RNA abundance and causes genome-wide pervasive transcription

**(a)** Percent of all RNAseq reads attributed to the sense direction of features in samples obtained from replicating cultures of the *M. tuberculosis* wt strain before or after 6h incubation with atc (wt 0h and wt 6h respectively) and the Rho-DUC strain before or after 1.5h, 3h, 6h, 9h and 24h incubation with atc (DUC 0h to 24h).

**(b)** Percent of the chromosome covered by reads in the same samples.

**(c)** Distribution of read values in the RNAseq samples. The normalized RNAseq reads from the wt and Rho-DUC strains were binned according to their values and the number of positions falling in the corresponding bin was calculated for each condition. The samples represented were prepared from the wt and the Rho-DUC *M. tuberculosis* strain before or after incubation with atc (0h and 1.5 to 24h). Color code is as in (a).

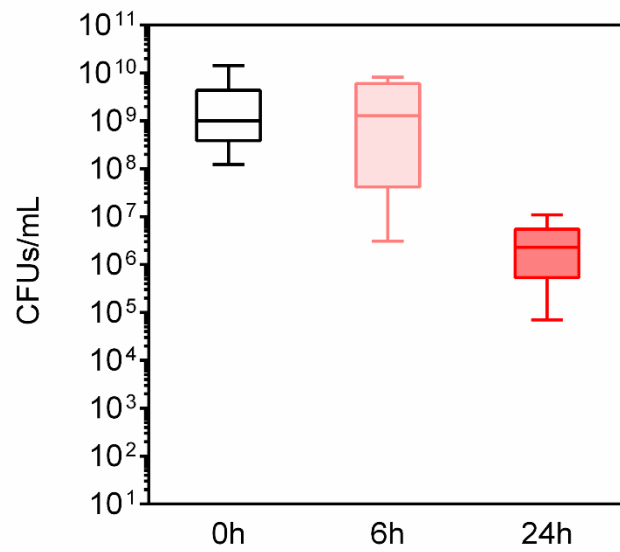

**Supplementary Figure 7 | Viability of Rho-DUC decrease marginally after exposure to atc for 6h and drastically after exposure for 24h in replicating conditions**

Summary of the data collected from 11 different experiments as described in figure 1c (boxplot shows the median value and 25 and 75 quantiles).

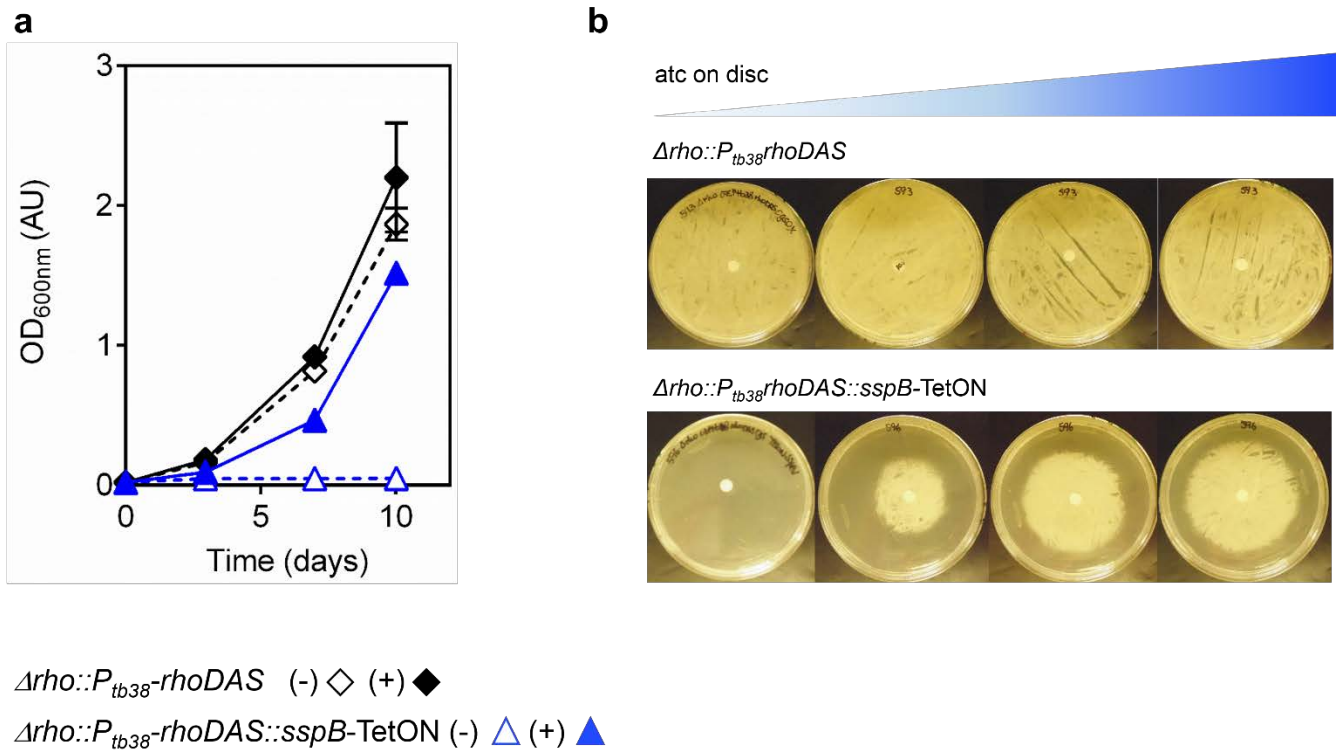

### Supplementary Figure 8 | Rho-TetON mutant for conditional *rho* expression in *M. tuberculosis*

(a) Growth of the Rho-TetON mutant ( $\Delta\rho::P_{tb38}\rho DAS::sspB-TetON$ ) and its parent strain ( $\Delta\rho::P_{tb38}\rho DAS$ ) in replicating conditions in the presence or absence of 1  $\mu\text{g/ml}$  of atc. Rho-DAS is expressed constitutively in  $\Delta\rho::P_{tb38}\rho DAS$ . In  $\Delta\rho::P_{tb38}\rho DAS::sspB-TetON$ , expression of SspB is repressed by a reverse TetR. As a consequence atc is required to prevent degradation of Rho-DAS. Data are means of triplicates cultures ( $\pm$ SD, some error bars too small to be seen).

(b) atc dependent growth of the Rho-TetON strain on solid medium. The discs contain 0, 100, 250, 500 ng of atc (left to right).

**a**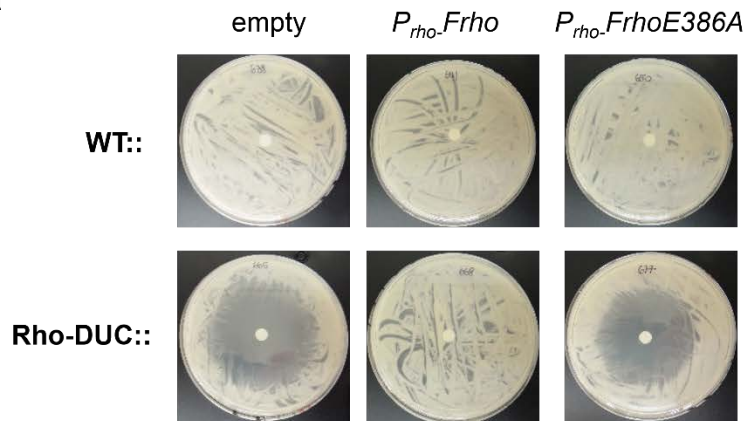**b**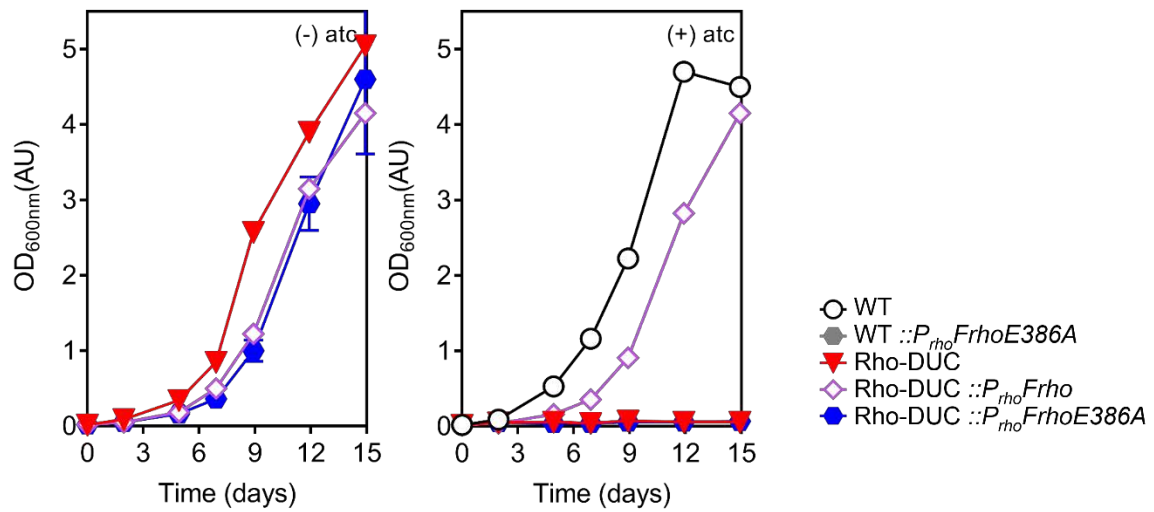**c**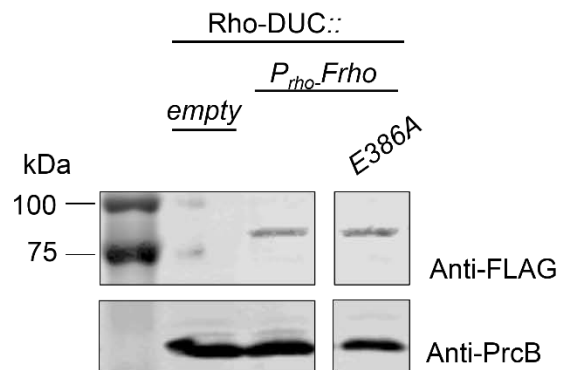

2 **Supplementary Figure 9 | Rho point mutant E386A fails to complement Rho Depletion in Rho-**  
3 **DUC**

4 **(a)** Complementation of Rho-DUC on solid medium by a constitutively expressed FLAG-tagged copy of  
5 Rho WT (*P<sub>rho</sub>rho*) or Rho point mutant E386A (*P<sub>rho</sub>rhoE386A*). 500 ng of atc was added on the discs.

6 **(b)** Complementation of Rho-DUC in liquid medium. The Rho-DUC strain constitutively expresses a  
7 FLAG-tagged WT Rho (*P<sub>rho</sub>Frho*), or a FLAG-tagged Rho-E386A (*P<sub>rho</sub>FrhoE386A*). Data are means of  
8 duplicate cultures ( $\pm$ SD, some error bars too small to be seen).

9 **(c)** Western Blot of protein lysates using an anti-FLAG antibody or anti-PrcB serum (loading control) of  
10 samples grown in the absence of atc in (b). The entire blots are shown in Supplementary Figure 14.

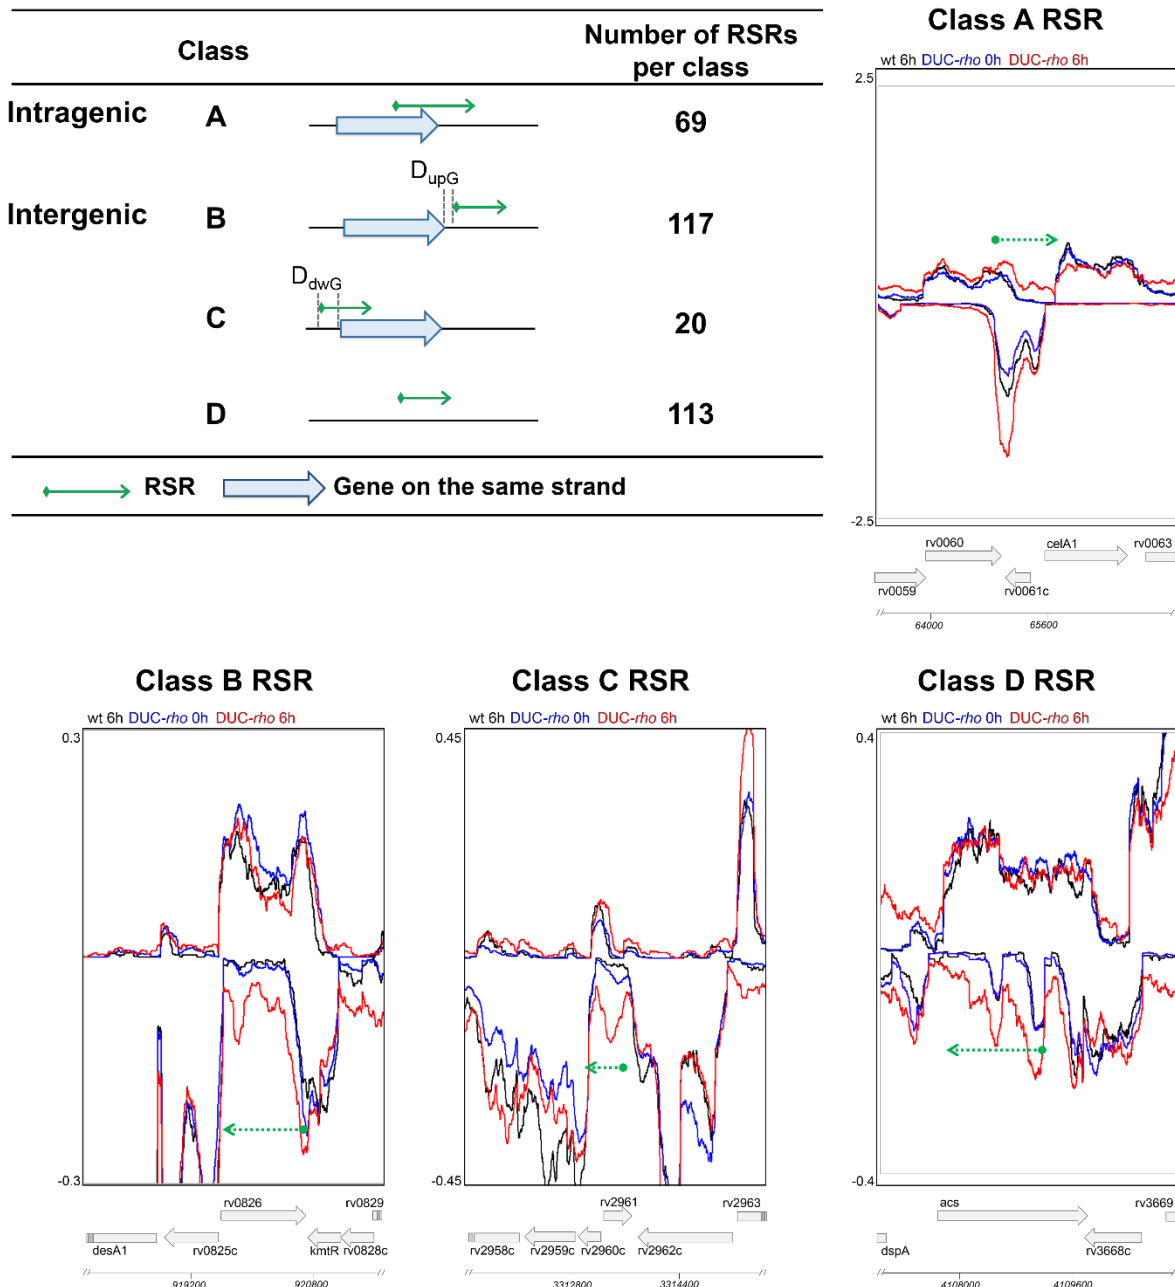

## Supplementary Figure 10 | Classes of RSRs and examples

RSRs have been classified as intragenic (class A) or intergenic (class B, C, D) according to their position relative to the closest gene that is transcribed in the same direction as the RSR (DupG: Distance to upstream Gene, DdwG: Distance to downstream Gene). Some RSRs belong to two classes: intragenic RSRs reaching into another gene are counted as A and C and RSRs terminating a gene based on the DupG distance and reaching into another gene are counted as B and C.

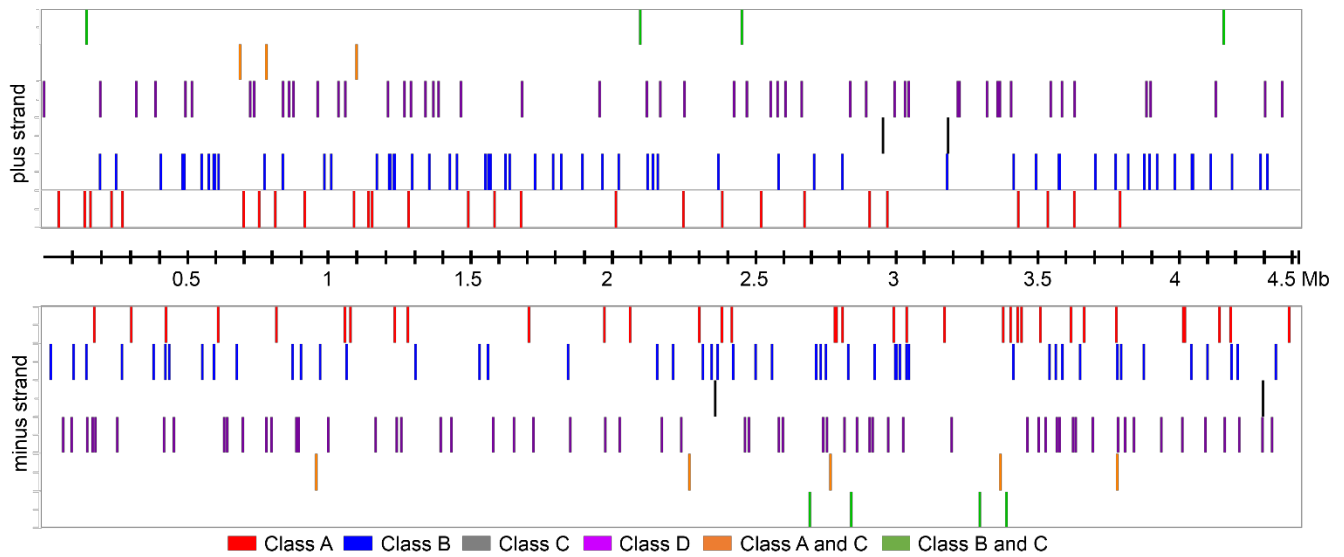

### Supplementary Figure 11 | The different classes of RSRs show no clustering along the *M. tuberculosis* genome

The RSRs are represented by the position of their starts on the plus or the minus strand along the chromosome of *M. tuberculosis*. For each strand the RSRs are scattered on 5 levels corresponding from the middle to the exterior to the classes of RSR: A, B, C, D or both A and C and both B and C. (RSRs are represented by their start position).

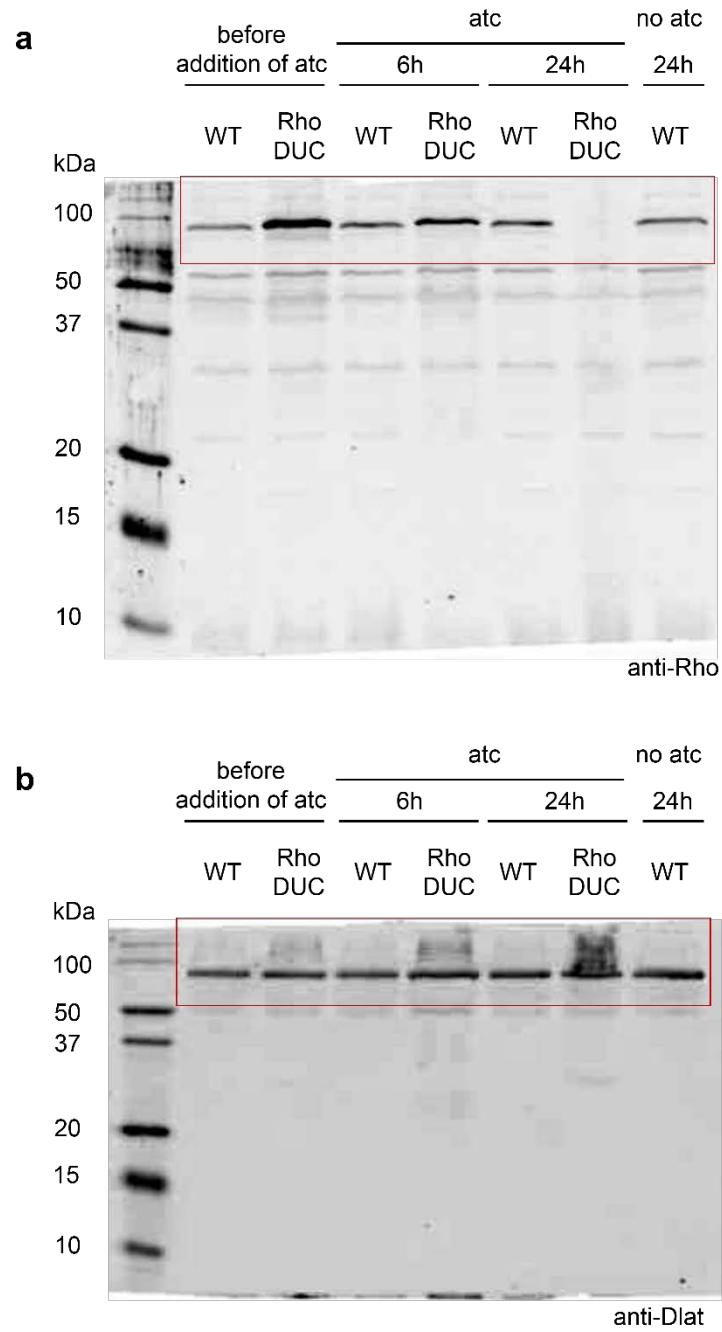

**Supplementary Figure 12 | Full blots from Figure 1**

Uncropped blots from Figure 1.

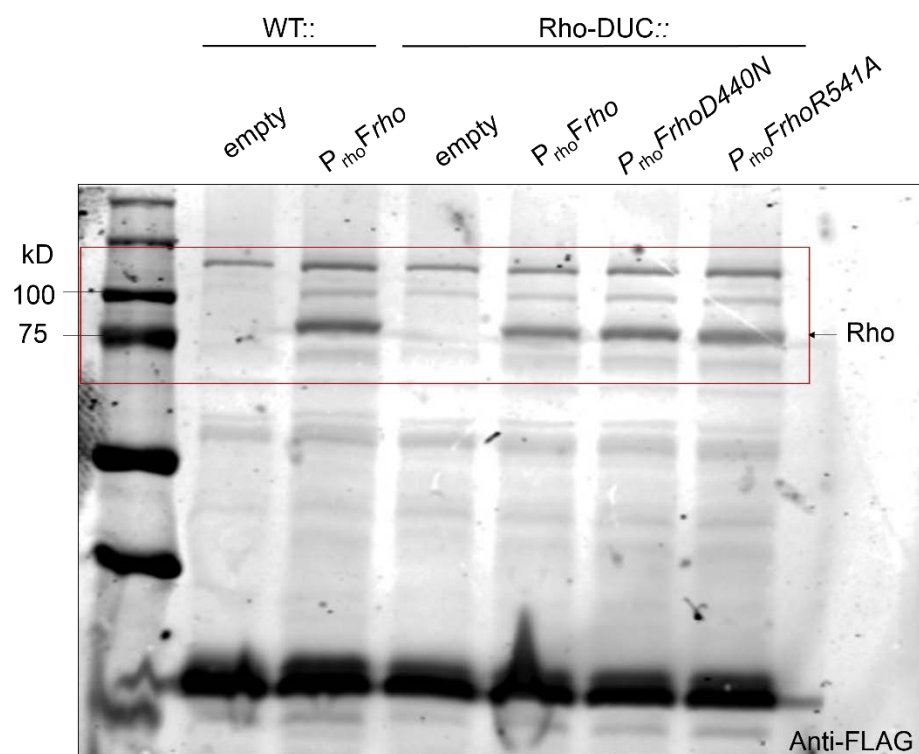

**Supplementary Figure 13 | Full blot from Figure 5**

Uncropped blot from Figure 5.

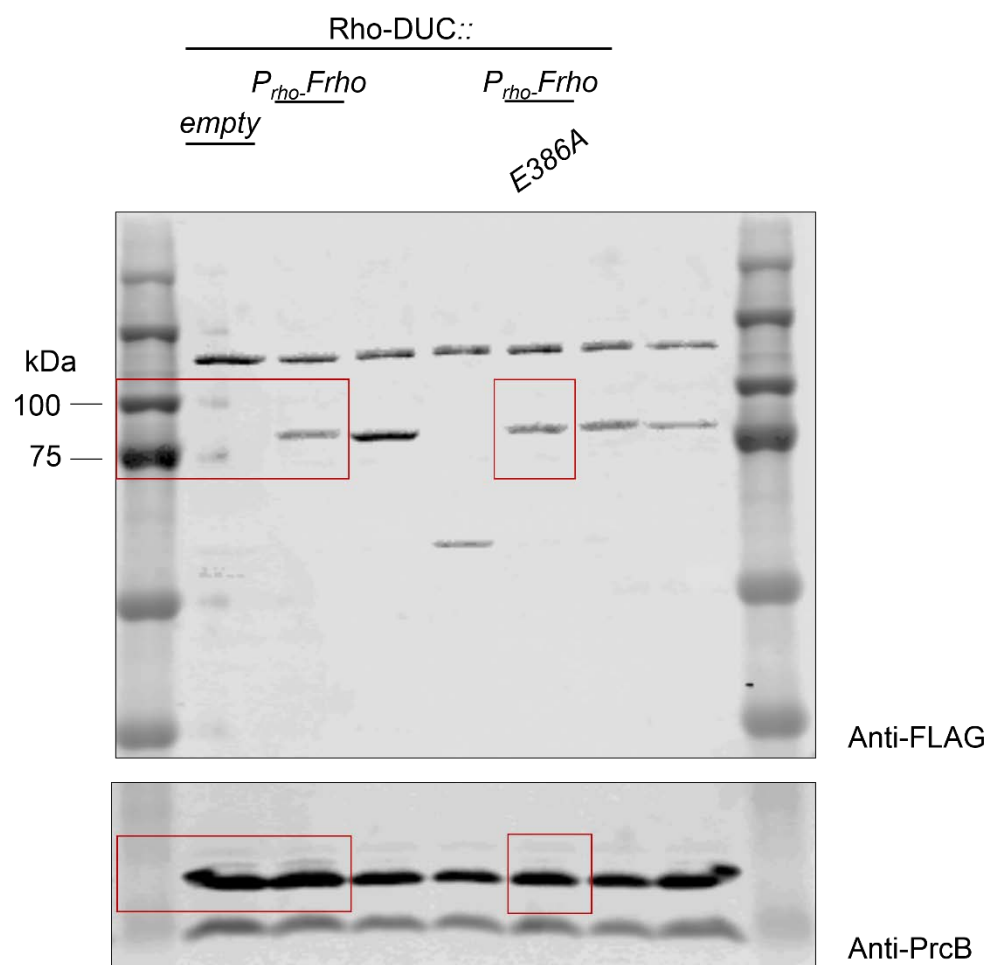

**Supplementary Figure 14 | Full blots from Supplementary Figure 9**

Uncropped blots from Supplementary Figure 9.

**Supplementary Table 1 | Plasmids used in this work**

| Plasmids                          | Description                                                                                                                                                                              | origin       |
|-----------------------------------|------------------------------------------------------------------------------------------------------------------------------------------------------------------------------------------|--------------|
| pNit-Rec-ET                       | Episomal replication, contains the enzymes for recombineering in mycobacteria                                                                                                            | <sup>2</sup> |
| pGMCS-P <sub>rho</sub> rho        | Integration into the att-L5 site, contains the 600 bp upstream of the <i>M. tuberculosis rho</i> and <i>M. tuberculosis rho</i>                                                          | This work    |
| pGMCZ-0X0X                        | Integration into the att-L5 site                                                                                                                                                         | This work    |
| pGMCZ-P <sub>rho</sub> rho        | Integration into the att-L5 site, contains the 600 bp upstream of the <i>M. tuberculosis rho</i> and <i>M. tuberculosis rho</i>                                                          | This work    |
| PGMCZ-P <sub>hsp60</sub> -rhoTb   | Integration into the att-L5 site, contains <i>M. tuberculosis rho</i> expressed under the control of the strong hsp60 promoter                                                           | This work    |
| pGMCZ-T38S38-P751-rhoTb-SD1       | Integration into the att-L5 site, contains <i>M. tuberculosis rho</i> expressed under the control of the promoter P751 harboring the operator <i>tetO4C5G</i> , and <i>revTetR</i>       | This work    |
| pGMCZ-T38S38-P751-rhoTb-SD2       | Integration into the att-L5 site, contains <i>M. tuberculosis rho</i> expressed under the control of the promoter P751 harboring the operator <i>tetO4C5G</i> , and <i>revTetR</i>       | This work    |
| pGMCZ-T38S38-P751-rhoTb-SD3       | Integration into the att-L5 site, contains <i>M. tuberculosis rho</i> expressed under the control of the promoter P751 harboring the operator <i>tetO4C5G</i> , and <i>revTetR</i>       | This work    |
| pGMCZ-T38S38-P751-rhoTb-SD5       | Integration into the att-L5 site, contains <i>M. tuberculosis rho</i> expressed under the control of the promoter P751 harboring the operator <i>tetO4C5G</i> , and <i>revTetR</i>       | This work    |
| pGMCZ-T38S38-P751-rhoTb-DAS+4 SD1 | Integration into the att-L5 site, contains <i>M. tuberculosis rho-DAS+4</i> expressed under the control of the promoter P751 harboring the operator <i>tetO4C5G</i> , and <i>revTetR</i> | This work    |
| pGMCZ-T38S38-P751-rhoTb-DAS+4 SD2 | Integration into the att-L5 site, contains <i>M. tuberculosis rho-DAS+4</i> expressed under the control of the promoter P751 harboring the operator <i>tetO4C5G</i> , and <i>revTetR</i> | This work    |
| pGMCZ-T38S38-P751-rhoTb-DAS+4 SD3 | Integration into the att-L5 site, contains <i>M. tuberculosis rho-DAS+4</i> expressed under the control of the promoter P751 harboring the operator <i>tetO4C5G</i> , and <i>revTetR</i> | This work    |
| pGMCZ-T38S38-P751-rhoTb-DAS+4 SD5 | Integration into the att-L5 site, contains <i>M. tuberculosis rho-DAS+4</i> expressed under the control of the promoter P751 harboring the operator <i>tetO4C5G</i> , and <i>revTetR</i> | This work    |

|                                        |                                                                                                                                                                                                                                                    |           |
|----------------------------------------|----------------------------------------------------------------------------------------------------------------------------------------------------------------------------------------------------------------------------------------------------|-----------|
| pGMCtKq29-TSC10M1-sspB-SD5             | Integration into the chromosome at the attachment of the Tweety phage (att-Tweety) site, contains the gene <i>sspB</i> under the control of a promoter containing the operator <i>tetO</i> , and the gene encoding the TetR repressor <i>tsc10</i> | This work |
| pGMCZq1-T38S38-0X                      | Integration into the att-L5 site, contains <i>revTetR</i>                                                                                                                                                                                          | This work |
| pGMCtKq27-TSC10M1-sspB                 | Integration into the chromosome at the attachment of the Tweety phage (att-Tweety) site, contains the gene <i>sspB</i> under the control of a promoter containing the operator <i>tetO</i> , and the gene encoding the TetR repressor <i>tsc10</i> | This work |
| pGMCgS-0X                              | Integration into the attachment site of the giles phage (att-giles)                                                                                                                                                                                | This work |
| pGMCgS-P <sub>rho</sub> rhoTb          | Integration into the att-giles site, contains the 600 bp upstream of the <i>M. tuberculosis rho</i> and <i>M. tuberculosis rho</i>                                                                                                                 | This work |
| pGMCgS-P <sub>rho</sub> rhoTbD440N     | Integration into the att-giles site, contains the 600 bp upstream of the <i>M. tuberculosis rho</i> and <i>M. tuberculosis rhoD440N</i>                                                                                                            | This work |
| pGMCgS-P <sub>rho</sub> rhoTbR541A     | Integration into the att-giles site, contains the 600 bp upstream of the <i>M. tuberculosis rho</i> and <i>M. tuberculosis rhoR541A</i>                                                                                                            | This work |
| pGMCgS-P <sub>rho</sub> FLAGrhoTb      | Integration into the att-giles site, contains the 600 bp upstream of the <i>M. tuberculosis rho</i> and N-terminal FLAG-tagged <i>M. tuberculosis rho</i>                                                                                          | This work |
| pGMCgS-P <sub>rho</sub> FLAGrhoTbD440N | Integration into the att-giles site, contains the 600 bp upstream of the <i>M. tuberculosis rho</i> and N-terminal FLAG-tagged <i>M. tuberculosis rhoD440N</i>                                                                                     | This work |
| pGMCgS-P <sub>rho</sub> FLAGrhoTbR541A | Integration into the att-giles site, contains the 600 bp upstream of the <i>M. tuberculosis rho</i> and N-terminal FLAG-tagged <i>M. tuberculosis rhoR541A</i>                                                                                     | This work |
| pGMCgS-P <sub>rho</sub> FLAGrhoTbE386A | Integration into the att-giles site, contains the 600 bp upstream of the <i>M. tuberculosis rho</i> and N-terminal FLAG-tagged <i>M. tuberculosis rhoE386A</i>                                                                                     | This work |
| pGMCZ-P <sub>tb38</sub> -rhoDAS+4      | Integration into the att-L5 site, contains <i>M. tuberculosis rho</i> -DAS+4 expressed under the control of strong P <sub>tb38</sub> promoter                                                                                                      | This work |
| pGMCgS-T38S38-P766-7C-sspB-SD5         | Integration into the att-giles site, contains the <i>sspB</i> gene under control of the promoter P766-7C harboring the operator <i>tetO4C5G</i> , and <i>revTetR</i> .                                                                             | This work |

**Supplementary Table 2: *Mycobacterium tuberculosis* strains used in this work**

| Strains                                    |                                                                                                                                                                                                                                                         |                                     |
|--------------------------------------------|---------------------------------------------------------------------------------------------------------------------------------------------------------------------------------------------------------------------------------------------------------|-------------------------------------|
| M. tuberculosis H37Rv                      | <i>Mycobacterium tuberculosis</i> H37Rv. Parent strain of all the following strains in this work.                                                                                                                                                       | Dr. Robert North, Trudeau Institute |
| Merodiploid H37Rv::CS-P <sub>rho</sub> rho | <i>Mycobacterium tuberculosis</i> H37Rv expressing an additional copy of <i>rho</i>                                                                                                                                                                     | This work                           |
| H37Rv::CZ-T38::CtK-sspB                    | <i>Mycobacterium tuberculosis</i> H37Rv expressing Reverse TetR from the attL5 site and sspB from the tweety integration site                                                                                                                           | This work                           |
| $\Delta$ rho::P <sub>rho</sub> rho         | H37Rv in which rho has been deleted, expressing <i>rho</i> constitutively from the att-L5 site                                                                                                                                                          | This work                           |
| $\Delta$ rho::PTetOFF-rhoDAS (SD1)         | Derivative of $\Delta$ rho::P <sub>rho</sub> rho in which att-L5 site construct has been replaced by a DAS+4 tagged copy of rho transcriptionally repressed by reverse TetR in the presence of atc                                                      | This work                           |
| $\Delta$ rho::PTetOFF-rhoDAS SD2           | Derivative of $\Delta$ rho::P <sub>rho</sub> rho in which att-L5 site construct has been replaced by a DAS+4 tagged copy of rho transcriptionally repressed by reverse TetR in the presence of atc                                                      | This work                           |
| $\Delta$ rho::PTetOFF-rhoDAS SD3           | Derivative of $\Delta$ rho::P <sub>rho</sub> rho in which att-L5 site construct has been replaced by a DAS+4 tagged copy of rho transcriptionally repressed by reverse TetR in the presence of atc                                                      | This work                           |
| $\Delta$ rho::PTetOFF-rhoDAS SD5           | Derivative of $\Delta$ rho::P <sub>rho</sub> rho in which att-L5 site construct has been replaced by a DAS+4 tagged copy of rho transcriptionally repressed by reverse TetR in the presence of atc                                                      | This work                           |
| $\Delta$ rho::PTetOFF-rho (SD1)            | Derivative of $\Delta$ rho::P <sub>rho</sub> rho in which att-L5 site construct has been replaced by a copy of rho transcriptionally repressed by reverse TetR in the presence of atc                                                                   | This work                           |
| $\Delta$ rho::PTetOFF-rho SD2              | Derivative of $\Delta$ rho::P <sub>rho</sub> rho in which att-L5 site construct has been replaced by a copy of rho transcriptionally repressed by reverse TetR in the presence of atc                                                                   | This work                           |
| $\Delta$ rho::PTetOFF-rho SD3              | Derivative of $\Delta$ rho::P <sub>rho</sub> rho in which att-L5 site construct has been replaced by a copy of rho transcriptionally repressed by reverse TetR in the presence of atc                                                                   | This work                           |
| $\Delta$ rho::PTetOFF-rho SD5              | Derivative of $\Delta$ rho::P <sub>rho</sub> rho in which att-L5 site construct has been replaced by a copy of rho transcriptionally repressed by reverse TetR in the presence of atc                                                                   | This work                           |
| Rho-DUC                                    | Derivative of $\Delta$ rho::P <sub>rho</sub> rho in which att-L5 site construct has been replaced by a DAS+4 tagged copy of rho transcriptionally repressed by reverse TetR in the presence of atc and expressing sspB from the tweety integration site | This work                           |
| Rho-DUC::P <sub>rho</sub> rho              | Rho-DUC expressing constitutively an additional copy of <i>rho</i>                                                                                                                                                                                      | This work                           |

|                                                      |                                                                                                                                                       |           |
|------------------------------------------------------|-------------------------------------------------------------------------------------------------------------------------------------------------------|-----------|
| Rho-DUC::P <sub>rho</sub> rhoD440N                   | Rho-DUC expressing constitutively a mutated copy of <i>rho</i> , <i>rhoD440N</i>                                                                      | This work |
| Rho-DUC::P <sub>rho</sub> rhoR541A                   | Rho-DUC expressing constitutively a mutated copy of <i>rho</i> , <i>rhoR541A</i>                                                                      | This work |
| Rho-DUC::P <sub>rho</sub> Frho                       | Rho-DUC expressing constitutively a FLAG-tagged copy of <i>rho</i>                                                                                    | This work |
| Rho-DUC::P <sub>rho</sub> FrhoD440N                  | Rho-DUC expressing constitutively a FLAG-tagged copy of <i>rho</i> , <i>rhoD440N</i>                                                                  | This work |
| Rho-DUC::P <sub>rho</sub> FrhoR541A                  | Rho-DUC expressing constitutively a FLAG-tagged copy of <i>rho</i> , <i>rhoR541A</i>                                                                  | This work |
| Rho-DUC::P <sub>rho</sub> FrhoE386A                  | Rho-DUC expressing constitutively a FLAG-tagged copy of <i>rho</i> , <i>rhoE386A</i>                                                                  |           |
| $\Delta$ rho::P <sub>tb38</sub> rhoDAS+4             | H37Rv in which <i>rho</i> has been deleted, expressing <i>rho</i> constitutively from the att-L5 site                                                 | This work |
| $\Delta$ rho::P <sub>tb38</sub> rhoDAS+4::sspB-TetON | $\Delta$ rho::P <sub>tb38</sub> rhoDAS+4 in which the protein SspB expressed in the absence of atc causes the degradation of Rho-DAS+4 tagged protein | This work |
| $\Delta$ rho::P <sub>TetOFF</sub> rho                |                                                                                                                                                       |           |

## Supplementary references

- 1 Woong Park, S. *et al.* Evaluating the sensitivity of Mycobacterium tuberculosis to biotin deprivation using regulated gene expression. *PLoS Pathog* **7**, e1002264, doi:10.1371/journal.ppat.1002264 (2011).
- 2 Murphy, K. C., Papavinasasundaram, K. & Sassetti, C. M. Mycobacterial recombineering. *Methods Mol Biol* **1285**, 177-199, doi:10.1007/978-1-4939-2450-9\_10 (2015).
